# Supplementary material for: Whole-Genome Sequence Analysis of Pseudorabies Virus Clinical Isolates from Pigs in China between 2012 and 2017 in China
Source: MDPI journal article supplement (doi:10.3390/v13071322), 2021-07-08
Supplement: s1 [file s1]

## Supplementary Material

Table S1. Sequencing result summary

| Strain name  | GenBank accession | Country (province, city)    | Clean reads* | Coverage $\geq 100X^{\&}$ | Average read depth <sup>\$</sup> |
|--------------|-------------------|-----------------------------|--------------|---------------------------|----------------------------------|
| AnH1/CHN2015 | MK618718          | China (Anhui, Bozhou)       | 999951       | 99.50%                    | 702.53                           |
| BJ1/CHN2014  | MK642564          | China (Beijing)             | 1010029      | 99.42%                    | 715.26                           |
| FJ1/CHN2016  | MK642565          | China (Fujian, Fuqing)      | 3634132      | 99.86%                    | 2844.84                          |
| GD1/CHN2016  | MK642566          | China (Guangdong, Yangchun) | 1000030      | 99.37%                    | 712.56                           |
| GD2/CHN2016  | MK642567          | China (Guangdong)           | 7381508      | 99.96%                    | 4903.4                           |
| GD3/CHN2016  | MK642568          | China (Guangdong, Fuchun)   | 7239364      | 99.95%                    | 5395.4                           |
| GD4/CHN2016  | MK642569          | China (Guangdong, Yangchun) | 5117776      | 99.78%                    | 3329.85                          |
| GX1/CHN2014  | MK642585          | China (Guangxi, Guigang)    | 6600062      | 99.94%                    | 5533.9                           |
| HeN1/CHN2012 | MK642583          | China (Henan, Sanmenxia)    | 1000027      | 99.39%                    | 673.32                           |
| HeN1/CHN2014 | MK642584          | China (Henan, Xinyang)      | 5540608      | 99.94%                    | 5002.18                          |
| HeN2/CHN2014 | MK642582          | China (Henan, Xinyang)      | 1000001      | 99.36%                    | 652.04                           |
| HeN3/CHN2014 | MK787153          | China (Henan, Luohe)        | 1009975      | 99.44%                    | 703.94                           |
| HeN4/CHN2014 | MK642581          | China (Henan, Zhumadian)    | 5284104      | 99.88%                    | 4563.02                          |
| HeN1/CHN2015 | MK642580          | China (Henan, Nanyang)      | 9043770      | 99.93%                    | 7364.34                          |
| HeN2/CHN2015 | MK642579          | China (Henan)               | 6699664      | 99.95%                    | 3760.48                          |
| HeN3/CHN2015 | MK642578          | China (Henan)               | 4875306      | 99.70%                    | 1419.74                          |
| HeN1/CHN2016 | MK642577          | China (Henan, Zhenzhou)     | 6886382      | 99.94%                    | 5169.51                          |
| HeN2/CHN2016 | MK642576          | China (Henan, Xinyang)      | 8670118      | 99.97%                    | 6122.11                          |
| HeN3/CHN2016 | MK642575          | China (Henan, Xiping)       | 5209702      | 99.82%                    | 3924.3                           |
| HuB1/CHN2015 | MK642574          | China (Hubei, Jinzhou)      | 6388198      | 99.93%                    | 5722.73                          |
| HuB2/CHN2015 | MK642573          | China (Hubei, Wuhan)        | 4687502      | 99.98%                    | 3776.56                          |

|              |          |                                 |          |        |         |
|--------------|----------|---------------------------------|----------|--------|---------|
| HuB3/CHN2015 | MK642572 | China (Hubei, Wuhan)            | 5005256  | 99.93% | 4436.24 |
| HuB4/CHN2015 | MK642571 | China (Hubei, Wuhan)            | 4942368  | 99.95% | 3178.75 |
| HuB5/CHN2015 | MK642570 | China (Hubei, Wuhan)            | 5305164  | 99.87% | 2822.75 |
| HuB1/CHN2016 | MK682662 | China (Hubei, Wuhan)            | 6706254  | 99.84% | 4929.4  |
| HuB2/CHN2016 | MK682663 | China (Hubei, Wuxue)            | 5978404  | 99.88% | 4646.5  |
| HuB3/CHN2016 | MK682664 | China (Hubei, Yichang)          | 4443330  | 99.92% | 3203.48 |
| HuB4/CHN2016 | MK682665 | China (Hubei, Hanchuan)         | 3750212  | 99.89% | 2350.76 |
| HuB5/CHN2016 | MK682666 | China (Hubei, Zhongxiang)       | 5436836  | 99.99% | 5144.62 |
| HuB6/CHN2016 | MK682667 | China (Hubei, Anlu)             | 10246602 | 99.97% | 7153.28 |
| HuB7/CHN2016 | MK682668 | China (Hubei, Huangzhou)        | 8256864  | 99.95% | 6910.98 |
| HuB8/CHN2016 | MK682669 | China (Hubei, Qianjiang)        | 4817506  | 99.90% | 3707.91 |
| HuB1/CHN2017 | MK682670 | China (Hubei)                   | 5919500  | 99.97% | 5515.16 |
| HuB2/CHN2017 | MK682671 | China (Hubei)                   | 4720654  | 99.89% | 3751.36 |
| HuN1/CHN2015 | MK682672 | China (Hunan, Zhuzhou)          | 5142096  | 99.92% | 3715.05 |
| HuN1/CHN2016 | MK682673 | China (Hunan)                   | 4527914  | 99.98% | 4332.4  |
| JS1/CHN2015  | MK682674 | China (Jiangsu, Huaian)         | 1000046  | 99.52% | 686.17  |
| JS2/CHN2015  | MK682675 | China (Jiangsu, Yanchen)        | 8014294  | 99.93% | 5677.47 |
| JS1/CHN2017  | MK682676 | China (Jiangsu)                 | 5221760  | 99.94% | 4628.69 |
| JX1/CHN2014  | MK787152 | China (Jiangxi, Fuzhou)         | 4891750  | 99.91% | 4012.34 |
| JX1/CHN2015  | MK787151 | China (Jiangxi, Nanchang)       | 4875462  | 99.96% | 3902.15 |
| JX2/CHN2015  | MK787150 | China (Jiangxi, Fengcheng)      | 5157302  | 99.95% | 4825.63 |
| NMG1/CHN2014 | MK787154 | China (Inner-Mongolia, Chifeng) | 4891176  | 99.96% | 4416.46 |
| SD1/CHN2015  | MK787155 | China (Shandong, Rizhao)        | 10897334 | 99.99% | 8618.92 |

|              |          |                             |         |        |         |
|--------------|----------|-----------------------------|---------|--------|---------|
| SD1/CHN2016  | MK787156 | China (Shandong, Rizhao)    | 4011868 | 99.89% | 3021.05 |
| SD2/CHN2016  | MK787164 | China (Shandong)            | 4042198 | 99.84% | 2950.73 |
| SHH1/CHN2015 | MK787156 | China (Shanghai)            | 1009951 | 99.28% | 694.12  |
| ZJ1/CHN2012  | MK787158 | China (Zhejiang, Quzhou)    | 1000045 | 98.94% | 681.58  |
| ZJ2/CHN2012  | MK787159 | China (Zhejiang, Lishui)    | 5774986 | 99.96% | 4940.4  |
| ZJ1/CHN2014  | MK787160 | China (Zhejiang, Lishui)    | 1010000 | 99.39% | 629.41  |
| ZJ2/CHN2014  | MK787161 | China (Zhejiang, Jinhua)    | 1000046 | 99.51% | 467.61  |
| ZJ1/CHN2015  | MK787162 | China (Zhejiang, Jiangshan) | 6414140 | 99.97% | 4910.84 |
| ZJ1/CHN2016  | MK787163 | China (Zhejiang)            | 5229744 | 99.79% | 3045.67 |
| ZJ1/CHN2017  | MK787149 | China (Zhejiang, Jiangshan) | 3243466 | 99.95% | 1854.25 |

\*: Clean reads were filtered reads. The raw reads contain the reads of host genome and irrelevant microorganisms. The raw reads were aligned with nucleotide database and all the reads from host genome or irrelevant microorganisms were recognized and removed. The reads left were called clean reads;

&: Coverage of Next-generation sequencing (NGS) describes the mean number of reads that align to, or "cover," known reference bases. The sequencing coverage level often determines whether variant discovery can be made with a certain degree of confidence at particular base positions. This column gives the percentage of the bases covered by more than 100 different reads, which indicates the confidence of genome sequencing.

\$. Average read depth indicates how many reads, on average, are likely to be aligned at a given reference base position.

Table S2. Previously published PRV strains

| Strain     | GenBank accession | Isolation time | Isolation location | Reference         |
|------------|-------------------|----------------|--------------------|-------------------|
| HN1201     | KP722022.1        | 2012           | China              | [1]               |
| HNB        | KM189914.3        | 2012           | China              | [2]               |
| HNX        | KM189912.1        | 2012           | China              | [3]               |
| HeN1       | KP098534.1        | 2012           | China              | [4]               |
| HLJ8       | KT824771.1        | 2014           | China              | [5]               |
| JS-2012    | KP257591.1        | 2012           | China              | [4]               |
| ZJ01       | KM061380.1        | 2012           | China              | Direct submission |
| TJ         | KJ789182.1        | 2012           | China              | [6]               |
| Fa         | KM189913.1        | 1990           | China              | [7]               |
| Ea         | KX423960.1        | 1990           | China              | [8]               |
| SC         | KT809429.1        | 1990           | China              | [5]               |
| Kolchis    | KT983811.1        | 2010           | Greece             | [9]               |
| Hercules   | KT983810.1        | 2010           | Greece             | [9]               |
| PRV-MdBio  | LT934125.1        | 2015           | Serbia             | Direct submission |
| ADV32751   | KU198433.1        | 2014           | Italy              | Direct submission |
| NIA3       | KU900059.1        | 1970s          | Northern Ireland   | [10]              |
| Kaplan     | KJ717942.1        | 1970s          | United States      | [11]              |
| Becker     | JF797219.1        | 1960s          | United States      | [12]              |
| Bartha-K61 | JF797217.1        | 1950s          | Hungary            | [12]              |

Table S3. RDP results summary

| Recombination events | Break points                               | Major parent strain | Minor parent strain | Recombinant strain |
|----------------------|--------------------------------------------|---------------------|---------------------|--------------------|
| Event 3              | Start: 36919-36984<br>End: 38009-38069     | HuB4/CHN2015        | Bartha-K61          | ZJ01               |
| Event 4              | Start: 127018-127204<br>End: 127585-127957 | ZJ2/CHN2012         | Bartha-K61          | ZJ01               |
| Event 6              | Start: 59019-67134<br>End: 67803-68107     | Fa                  | Bartha-K61          | HeN1(KP098534)     |
| Event 7              | Start: 89345-90108<br>End: 90971-91404     | SC                  | Bartha-K61          | HeN1(KP098534)     |
| Event 8              | Start: 102899-104850<br>End: 105886-106341 | HuN1/CHN2015        | Bartha-K61          | ZJ01               |
| Event 10             | Start: 120450-125939<br>End: 126971-127899 | Ea                  | ZJ01                | SD1/CHN2016        |
| Event 11             | Start: 114432-114529<br>End: 114747-115668 | BJ1/CHN2014         | Bartha-K61          | ZJ01               |
| Event 12             | Start: 58184-58270<br>End: 58554-59737     | Fa                  | Bartha-K61          | JS-2012            |
| Event 14             | Start: 122860-125198<br>End: 125258-126722 | SD1/CHN2015         | Bartha-K61          | ZJ01               |
| Event 15             | Start: 114238-114422<br>End: 114575-114751 | Fa                  | Bartha-K61          | JS-2012            |
| Event 17             | Start: 117979-120447<br>End: 125853-127068 | Ea                  | Bartha-K61          | 13 strains*        |
| Event 19             | Start: 107098-107501<br>End: 107544-108287 | Fa                  | Bartha-K61          | HNX                |
| Event 24             | Start: 17578-34261<br>End: 36951-36984     | ZJ01                | GD2                 | ZJ01               |
| Event 26             | Start: 58773-59737<br>End: 59790-61127     | ZJ01                | Bartha-K61          | JS-2012            |
| Event 28             | Start: 85057-99750<br>End: 99982-100629    | Fa                  | Bartha-K61          | HeN1(KP098534)     |
| Event 30             | Start: 90907-107069<br>End: 107135-107809  | Fa                  | ZJ01                | HeN2/CHN2015       |
| Event 35             | Start: 126436-126927<br>End: 126951-127891 | Ea                  | ZJ01                | HeN2/CHN2014       |
| Event 36             | Start: 17577-48341<br>End: 48959-77652     | ZJ01                | HuB1/CHN2017        | JS-2012            |
| Event 37             | Start: 114662-116395<br>End: 117591-120490 | HuB1/CHN2017        | Bartha-K61          | 59 strains*        |
| Event 40             | Start: 75987-89029<br>End: 89060-103826    | ZJ01                | HuB1/CHN2017        | HeN1(KP098534)     |

|          |                                        |      |              |                |
|----------|----------------------------------------|------|--------------|----------------|
| Event 41 | Start: 34983-35237<br>End: 35270-35480 | Fa   | Bartha-K61   | HeN1(KP098534) |
| Event 47 | Start: 94202<br>End: 126883-127379     | HNB  | Bartha-K61   | HuB1/CHN2017   |
| Event 52 | Start: 3016-17043<br>End: 17577-18367  | ZJ01 | HeN1/CHN2016 | HuB1/CHN2017   |

\*: The recombination strains were listed in Table S4.

Table S4. Recombination events detected in multiple PRV strains

| Recombination event | PRV isolates with recombination events detected                                                                                                                                                                                                                                                                                                                                                                                                                                                                                                                                                                                                                                                                                                                                              |
|---------------------|----------------------------------------------------------------------------------------------------------------------------------------------------------------------------------------------------------------------------------------------------------------------------------------------------------------------------------------------------------------------------------------------------------------------------------------------------------------------------------------------------------------------------------------------------------------------------------------------------------------------------------------------------------------------------------------------------------------------------------------------------------------------------------------------|
| Event 37            | HeN1/CHN2014, HeN2/CHN2014, HeN3/CHN2014, HeN4/CHN2014, HeN5/CHN2014, HeN1/CHN2015, HeN2/CHN2015, HeN3/CHN2015, HeN1/CHN2016, HeN2/CHN2016, HeN3/CHN2016, ZJ1/CHN2012, ZJ2/CHN2012, ZJ1/CHN2014, ZJ2/CHN2014, ZJ1/CHN2015, ZJ1/CHN2016, ZJ1/CHN2017, HuB1/CHN2015, HuB2/CHN2015, HuB3/CHN2015, HuB4/CHN2015, HuB5/CHN2015, HuB1/CHN2016, HuB2/CHN2016, HuB3/CHN2016, HuB4/CHN2016, HuB5/CHN2016, HuB6/CHN2016, HuB7/CHN2016, HuB8/CHN2016, HuB2/CHN2017, JX1/CHN2014, JX1/CHN2015, JX2/CHN2015, GX1/CHN2014, BJ1/CHN2014, SHH1/CHN2015, JS1/CHN2015, JS2/CHN2015, JS1/CHN2017, GD1/CHN2016, GD2/CHN2016, GD3/CHN2016, GD4/CHN2016, SD1/CHN2015, SD1/CHN2016, SD2/CHN2016, AnH1/CHN2015, HuN1/CHN2015, HuN1/CHN2016, NMG1/CHN2014, FJ1/CHN2016, JS-2012, HNB, HNX, HLJ8, HeN1(KP098534), ZJ01 |
| Event 17            | HuB1/CHN2015, HuB5/CHN2016, HuB6/CHN2016, JS2/CHN2015, JS1/CHN2017, JX1/CHN2015, JX2/CHN2015, HeN1/CHN2016, NMG1/CHN2014, ZJ1/CHN2012, ZJ1/CHN2017, HNX, JS-2012                                                                                                                                                                                                                                                                                                                                                                                                                                                                                                                                                                                                                             |

Table S5. *P* value of each recombination events detected by RDP

|          | Detection method         |                          |                          |                         |                         |                         |                         |
|----------|--------------------------|--------------------------|--------------------------|-------------------------|-------------------------|-------------------------|-------------------------|
|          | RDP                      | GENECONV                 | Bootscan                 | Maxchi                  | Chimaera                | Siscan                  | 3seq                    |
| Event 3  | $5.775 \times 10^{-105}$ | $8.064 \times 10^{-112}$ | $2.801 \times 10^{-109}$ | $1.163 \times 10^{-20}$ | $7.926 \times 10^{-21}$ | $4.903 \times 10^{-20}$ | $6.994 \times 10^{-13}$ |
| Event 4  | $1.567 \times 10^{-101}$ | $4.913 \times 10^{-112}$ | $7.249 \times 10^{-97}$  | $5.779 \times 10^{-19}$ | $7.274 \times 10^{-19}$ | $2.376 \times 10^{-17}$ | $6.994 \times 10^{-13}$ |
| Event 6  | $2.648 \times 10^{-60}$  | $2.979 \times 10^{-59}$  | $1.205 \times 10^{-56}$  | $6.170 \times 10^{-16}$ | $4.916 \times 10^{-17}$ | $5.989 \times 10^{-10}$ | $7.993 \times 10^{-13}$ |
| Event 7  | $1.090 \times 10^{-52}$  | $2.889 \times 10^{-53}$  | $9.675 \times 10^{-53}$  | $4.163 \times 10^{-11}$ | $2.599 \times 10^{-11}$ | $1.308 \times 10^{-10}$ | $6.994 \times 10^{-13}$ |
| Event 8  | $9.158 \times 10^{-44}$  | $6.572 \times 10^{-30}$  | $4.610 \times 10^{-44}$  | $6.512 \times 10^{-11}$ | $4.553 \times 10^{-11}$ | NS                      | $6.994 \times 10^{-13}$ |
| Event 10 | $3.492 \times 10^{-37}$  | $3.510 \times 10^{-39}$  | $9.277 \times 10^{-34}$  | $2.828 \times 10^{-6}$  | $3.075 \times 10^{-11}$ | $8.329 \times 10^{-5}$  | $9.992 \times 10^{-14}$ |
| Event 11 | $6.598 \times 10^{-36}$  | $7.524 \times 10^{-39}$  | $4.942 \times 10^{-36}$  | $1.785 \times 10^{-6}$  | $1.604 \times 10^{-6}$  | $6.140 \times 10^{-4}$  | $2.110 \times 10^{-9}$  |
| Event 12 | $1.715 \times 10^{-31}$  | $2.156 \times 10^{-33}$  | $1.259 \times 10^{-31}$  | $5.001 \times 10^{-9}$  | $3.850 \times 10^{-9}$  | $7.644 \times 10^{-7}$  | $7.993 \times 10^{-13}$ |
| Event 14 | $4.031 \times 10^{-30}$  | $9.180 \times 10^{-27}$  | $8.230 \times 10^{-13}$  | $1.242 \times 10^{-8}$  | $5.604 \times 10^{-9}$  | $8.816 \times 10^{-15}$ | $6.994 \times 10^{-13}$ |
| Event 15 | $3.443 \times 10^{-26}$  | $3.384 \times 10^{-29}$  | $4.090 \times 10^{-18}$  | $5.720 \times 10^{-5}$  | $5.281 \times 10^{-5}$  | $9.344 \times 10^{-5}$  | $7.993 \times 10^{-13}$ |
| Event 17 | $1.628 \times 10^{-4}$   | $1.770 \times 10^{-24}$  | $1.011 \times 10^{-11}$  | $2.984 \times 10^{-6}$  | $1.270 \times 10^{-4}$  | $7.208 \times 10^{-28}$ | $7.993 \times 10^{-13}$ |
| Event 19 | $2.535 \times 10^{-24}$  | $2.019 \times 10^{-22}$  | $1.188 \times 10^{-22}$  | $8.218 \times 10^{-4}$  | $7.938 \times 10^{-4}$  | NS                      | $1.024 \times 10^{-10}$ |
| Event 24 | $4.368 \times 10^{-18}$  | $2.538 \times 10^{-12}$  | $1.602 \times 10^{-13}$  | $4.005 \times 10^{-7}$  | $4.368 \times 10^{-18}$ | $4.368 \times 10^{-18}$ | $1.998 \times 10^{-13}$ |
| Event 26 | $2.233 \times 10^{-15}$  | $4.994 \times 10^{-14}$  | $1.961 \times 10^{-15}$  | $4.807 \times 10^{-2*}$ | $4.277 \times 10^{-2}$  | $5.444 \times 10^{-5}$  | $1.929 \times 10^{-6}$  |
| Event 28 | $2.213 \times 10^{-15}$  | $2.065 \times 10^{-13}$  | $2.127 \times 10^{-15}$  | $3.355 \times 10^{-2}$  | $1.385 \times 10^{-2}$  | $3.679 \times 10^{-3}$  | $1.241 \times 10^{-7}$  |
| Event 30 | $4.811 \times 10^{-14}$  | $7.083 \times 10^{-9}$   | $7.089 \times 10^{-13}$  | $1.425 \times 10^{-2}$  | $3.205 \times 10^{-3}$  | $1.549 \times 10^{-7}$  | $4.869 \times 10^{-7}$  |
| Event 35 | $2.208 \times 10^{-12}$  | $4.797 \times 10^{-13}$  | $2.120 \times 10^{-12}$  | $3.040 \times 10^{-2}$  | $1.641 \times 10^{-2}$  | NS                      | $2.967 \times 10^{-5}$  |
| Event 36 | $1.296 \times 10^{-8}$   | $1.379 \times 10^{-5}$   | $7.290 \times 10^{-11}$  | NS                      | NS                      | $2.917 \times 10^{-4}$  | $5.648 \times 10^{-3}$  |
| Event 37 | $2.784 \times 10^{-4}$   | $6.525 \times 10^{-2}$   | $6.165 \times 10^{-5}$   | $1.256 \times 10^{-3}$  | $9.087 \times 10^{-4}$  | $1.222 \times 10^{-9}$  | $1.883 \times 10^{-4}$  |
| Event 40 | $2.067 \times 10^{-7}$   | $2.536 \times 10^{-9}$   | $1.624 \times 10^{-7}$   | NS                      | $5.054 \times 10^{-3}$  | $1.210 \times 10^{-7}$  | $4.627 \times 10^{-4}$  |
| Event 41 | NS                       | $9.270 \times 10^{-11}$  | $5.338 \times 10^{-11}$  | NS                      | NS                      | $1.487 \times 10^{-7}$  | $5.091 \times 10^{-4}$  |
| Event 47 | $2.325 \times 10^{-4}$   | $2.709 \times 10^{-3}$   | $5.363 \times 10^{-4}$   | $3.290 \times 10^{-8}$  | $2.669 \times 10^{-13}$ | $1.650 \times 10^{-20}$ | $1.155 \times 10^{-3}$  |
| Event 52 | $3.921 \times 10^{-6}$   | $6.390 \times 10^{-3}$   | $1.246 \times 10^{-6}$   | $2.782 \times 10^{-4}$  | $1.004 \times 10^{-3}$  | $1.162 \times 10^{-11}$ | $4.756 \times 10^{-4}$  |

\*: Positive threshold,  $P < 0.001$ ; All the P values larger than 0.001 were highlighted by gray.



## Reference

1. Xiang, S.; Zhou, Z.; Hu, X.; Li, Y.; Zhang, C.; Wang, J.; Li, X.; Tan, F.; Tian, K., Complete Genome Sequence of a Variant Pseudorabies Virus Strain Isolated in Central China. *Genome Announcements* **2016**, 4, (2), e00149-16.
2. Yu, T.; Chen, F.; Ku, X.; Zhu, Y.; Ma, H.; Li, S.; He, Q., Complete Genome Sequence of Novel Pseudorabies Virus Strain HNB Isolated in China. *Genome Announc* **2016**, 4, (1), e01641-15.
3. Ye, S.; Shao, K.; Li, Z.; Guo, N.; Zuo, Y.; Li, Q.; Lu, Z.; Chen, L.; He, Q.; Han, H., Antiviral Activity of Graphene Oxide: How Sharp Edged Structure and Charge Matter. *ACS Appl Mater Interfaces* **2015**, 7, (38), 21571-9.
4. Ye, C.; Zhang, Q. Z.; Tian, Z. J.; Zheng, H.; Zhao, K.; Liu, F.; Guo, J. C.; Tong, W.; Jiang, C. G.; Wang, S. J.; Shi, M.; Chang, X. B.; Jiang, Y. F.; Peng, J. M.; Zhou, Y. J.; Tang, Y. D.; Sun, M. X.; Cai, X. H.; An, T. Q.; Tong, G. Z., Genomic characterization of emergent pseudorabies virus in China reveals marked sequence divergence: Evidence for the existence of two major genotypes. *Virology* **2015**, 483, 32-43.
5. Ye, C.; Guo, J. C.; Gao, J. C.; Wang, T. Y.; Zhao, K.; Chang, X. B.; Wang, Q.; Peng, J. M.; Tian, Z. J.; Cai, X. H.; Tong, G. Z.; An, T. Q., Genomic analyses reveal that partial sequence of an earlier pseudorabies virus in China is originated from a Bartha-vaccine-like strain. *Virology* **2016**, 491, 56-63.
6. Luo, Y.; Li, N.; Cong, X.; Wang, C. H.; Du, M.; Li, L.; Zhao, B.; Yuan, J.; Liu, D. D.; Li, S.; Li, Y.; Sun, Y.; Qiu, H. J., Pathogenicity and genomic characterization of a pseudorabies virus variant isolated from Bartha-K61-vaccinated swine population in China. *Vet Microbiol* **2014**, 174, (1-2), 107-15.
7. Yu, T.; Chen, F.; Ku, X.; Fan, J.; Zhu, Y.; Ma, H.; Li, S.; Wu, B.; He, Q., Growth characteristics and complete genomic sequence analysis of a novel pseudorabies virus in China. *Virus Genes* **2016**, 52, (4), 474-83.
8. Wang, X.; Wu, C.-X.; Song, X.-R.; Chen, H.-C.; Liu, Z.-F., Comparison of pseudorabies virus China reference strain with emerging variants reveals independent virus evolution within specific geographic regions. *Virology* **2017**, 506, 92-98.
9. Papageorgiou, K. V.; Suarez, N. M.; Wilkie, G. S.; Filioussis, G.; Papaioannou, N.; Nauwynck, H. J.; Davison, A. J.; Kritas, S. K., Genome Sequences of Two Pseudorabies Virus Strains Isolated in Greece. *Genome Announc* **2016**, 4, (1),

e01624-15.

10. Mathijs, E.; Vandenbussche, F.; Verpoest, S.; De Regge, N.; Van Borm, S., Complete Genome Sequence of Pseudorabies Virus Reference Strain NIA3 Using Single-Molecule Real-Time Sequencing. *Genome Announcements* **2016**, 4, (3), e00440-16.
11. Tombacz, D.; Sharon, D.; Olah, P.; Csabai, Z.; Snyder, M.; Boldogkoi, Z., Strain Kaplan of Pseudorabies Virus Genome Sequenced by PacBio Single-Molecule Real-Time Sequencing Technology. *Genome Announc* **2014**, 2, (4), e00628-14.
12. Szpara, M. L.; Tafuri, Y. R.; Parsons, L.; Shamim, S. R.; Verstrepen, K. J.; Legendre, M.; Enquist, L. W., A wide extent of inter-strain diversity in virulent and vaccine strains of alphaherpesviruses. *PLoS Pathog* **2011**, 7, (10), e1002282.
